# Supplementary material for: Reduced miR-203 predicts metastasis and poor survival in esophageal carcinoma
Source: publisher site journal article supplement (doi:10.18632/aging.102543), 2019-12-16
Supplement: Supplementary file [file aging-v11i24-102543-supplementary-material-SD2.pdf]

## **SUPPLEMENTARY TABLES**

Please browse Full Text version to see the data of Supplementary Tables 1–3

**Supplementary Table 1. Differential expression of miRNAs between malignant esophageal tissue and normal in GSE6188.**

**Supplementary Table 2. Differential expression of miRNAs between malignant esophageal tissue and normal in GSE43732.**

**Supplementary Table 3. Top pathways associated with 162 candidate targets of miR-203 in EC according to the enrichment analysis based on GO biological process.**
