# Supplementary material for: Reduced miR-203 predicts metastasis and poor survival in esophageal carcinoma
Source: Aging (Albany NY). 2019 Dec 16;11(24):12114–30. doi: 10.18632/aging.102543 (PMC6949080; doi:10.18632/aging.102543)
Supplement: Supplementary Table 1 [file aging-11-102543-s002..xlsx]

## Sheet: Sheet1
Supplementary Table S1. Differential expression of miRNAs between malignant esophageal tissue and normal in GSE6188
ID	logFC	AveExpr	t	P.Value	adj.P.Val
hsa-miR-133a	-1.79637	9.97009	-7.32202	1.83887e-11	1.35026e-09
hsa-miR-133b	-1.94077	9.45511	-6.87767	1.93586e-10	8.29195e-09
hsa-miR-1	-1.65187	11.3787	-5.03919	1.44021e-06	2.17726e-05
hsa-miR-30a-3p	-0.957431	9.20384	-4.92614	2.36294e-06	3.28256e-05
hsa-miR-203	-1.19902	13.1688	-4.7133	5.8859e-06	6.67497e-05
hsa-miR-181d	0.88852	9.77102	4.58274	1.01694e-05	0.000102492
hsa-miR-409-3p	0.775937	8.25973	3.88638	0.000157379	0.0011896
hsa-miR-30a-5p	-0.525567	12.8008	-3.75121	0.000258226	0.00184345
hsa-miR-134	0.796137	9.40457	3.73438	0.000274402	0.00193209
hsa-miR-324-5p	0.578994	9.9767	3.51702	0.000591153	0.00342723
hsa-miR-152	0.593573	11.5257	3.36953	0.000976467	0.00469069
hsa-miR-376b	0.923528	6.92998	3.31457	0.00117261	0.00528704
hsa-miR-98	0.5856	11.6085	2.96491	0.00356827	0.0123925
hsa-miR-17-5p	0.499143	12.9439	2.91344	0.00417137	0.0139226
hsa-miR-429	0.598337	10.7552	2.81414	0.00560603	0.0176779
hsa-miR-30e-3p	-0.380111	9.7368	-2.15444	0.0329422	0.0653999
hsa-miR-17-3p	0.325467	10.5986	1.98709	0.0488925	0.0863744
hsa-miR-7	2.29846	9.84969	9.30016	2.83123e-16	7.40873e-14
hsa-miR-503	2.06131	7.69856	9.29704	2.88278e-16	7.40873e-14
hsa-miR-424	2.00803	11.1356	9.1824	5.58783e-16	9.57381e-14
hsa-miR-196a	2.50291	7.66556	8.56014	1.9604e-14	2.51912e-12
hsa-miR-375	-2.76343	9.09419	-8.36218	5.99423e-14	6.16207e-12
hsa-miR-196b	2.30781	6.75056	7.66198	2.91685e-12	2.49877e-10
PREDICTED_MIR220	2.10874	6.17356	7.24458	2.78399e-11	1.78871e-09
hsa-miR-301	1.87201	7.79861	7.21753	3.21663e-11	1.83705e-09
rno-miR-301	1.66513	7.78694	6.96515	1.22414e-10	6.29206e-09
hsa-miR-183	1.70163	7.68837	6.91313	1.60817e-10	7.51456e-09
hsa-miR-25	1.09304	11.9791	6.23751	5.09298e-09	2.01368e-07
hsa-miR-130b	1.10607	10.9946	6.20649	5.94319e-09	2.182e-07
hsa-miR-497	-1.03266	11.4966	-6.1342	8.50338e-09	2.91383e-07
hsa-miR-146b	1.04962	11.667	6.0429	1.33264e-08	4.28111e-07
hsa-miR-182	1.53773	8.75065	5.99689	1.66901e-08	5.04631e-07
hsa-miR-339	0.928904	8.77201	5.91274	2.51296e-08	7.1759e-07
rno-miR-7	1.47326	7.82717	5.80827	4.15818e-08	1.1249e-06
hsa-miR-18a	1.02408	10.2404	5.72934	6.0632e-08	1.55824e-06
hsa-miR-422a	-0.79479	10.7993	-5.50069	1.77822e-07	4.35241e-06
anti-mir128B-3	0.971739	10.2025	5.45057	2.2436e-07	5.24186e-06
hsa-miR-100	-0.958413	13.0028	-5.4321	2.44345e-07	5.46058e-06
rno-miR-424	1.46859	8.2303	5.35019	3.56029e-07	7.62494e-06
hsa-miR-99a	-0.926221	13.2984	-5.33629	3.79395e-07	7.80036e-06
hsa-miR-493	1.51744	6.08907	5.28635	4.76295e-07	9.29219e-06
hsa-miR-450	1.64016	6.01159	5.28095	4.88111e-07	9.29219e-06
hsa-miR-18b	1.10609	9.13047	5.20936	6.74629e-07	1.23843e-05
hsa-miR-96	1.24098	9.34843	5.1683	8.11259e-07	1.43789e-05
hsa-miR-22	0.717157	13.3462	5.15894	8.45993e-07	1.44947e-05
hsa-miR-422b	-0.836779	12.1198	-5.13277	9.50916e-07	1.57668e-05
hsa-miR-9	1.26972	7.36256	5.05413	1.34827e-06	2.12937e-05
rno-miR-140	-0.936346	10.7057	-5.05099	1.36711e-06	2.12937e-05
anti-mir9-3	1.40521	7.85132	5.02448	1.53664e-06	2.25666e-05
PREDICTED_MIR157	1.13054	7.97642	5.0055	1.67043e-06	2.385e-05
hsa-miR-150	-1.12825	11.4934	-4.86778	3.04258e-06	4.11549e-05
hsa-miR-34c	1.04092	7.76048	4.84969	3.28929e-06	4.33511e-05
hsa-miR-34b	1.03114	8.74191	4.83776	3.46254e-06	4.44935e-05
hsa-miR-382	1.09496	7.78478	4.83201	3.54909e-06	4.44935e-05
hsa-miR-185	0.650827	10.9084	4.78304	4.37704e-06	5.31782e-05
hsa-miR-206	1.34457	7.22965	4.77923	4.44876e-06	5.31782e-05
hsa-miR-151	0.689273	10.4792	4.72898	5.50798e-06	6.43432e-05
hsa-miR-19a	0.854542	11.0879	4.70979	5.97371e-06	6.67497e-05
hsa-miR-181a	0.791002	11.0314	4.67541	6.9053e-06	7.55176e-05
hsa-miR-128b	0.902706	9.57576	4.66876	7.10097e-06	7.60396e-05
hsa-miR-16	0.623369	14.0601	4.61685	8.82438e-06	9.25659e-05
has-PreMIR-9-1	1.00854	7.12739	4.58911	9.90432e-06	0.000101816
hsa-miR-370	1.03294	9.49702	4.5725	1.06109e-05	0.000104884
anti-mir9-5	1.29682	7.97816	4.37683	2.35975e-05	0.000228851
hsa-miR-155	0.821279	11.399	4.32149	2.94566e-05	0.000280383
hsa-miR-128a	0.837605	9.69444	4.31158	3.06436e-05	0.000286378
hsa-miR-214	0.7351	11.5015	4.2812	3.4577e-05	0.000317368
hsa-miR-509	0.98418	7.44894	4.25942	3.76901e-05	0.000339872
hsa-miR-490	1.33654	6.15947	4.20445	4.67884e-05	0.000414642
hsa-miR-181b	0.812139	10.4364	4.18741	5.00137e-05	0.000435713
hsa-let-7i	0.526277	13.4301	4.12686	6.3282e-05	0.000542116
hsa-miR-431	1.25505	5.30709	4.08353	7.47826e-05	0.000630135
hsa-miR-409-5p	1.08314	6.28179	4.06989	7.87974e-05	0.000653256
hsa-miR-198	0.907265	8.83834	4.05602	8.30889e-05	0.0006779
hsa-miR-506	1.24693	5.35911	4.0257	9.32682e-05	0.00074906
rno-miR-34b	1.34451	5.90691	3.99072	0.00010649	0.000842086
hsa-miR-213	0.890904	8.70194	3.91287	0.000142619	0.0011107
hsa-miR-449	1.18597	5.67784	3.88684	0.00015711	0.0011896
mmu-miR-140	-0.810442	10.8338	-3.85347	0.000177745	0.00132407
has-PreMIR-9-3	0.888371	6.33945	3.79485	0.000220368	0.00161813
hsa-miR-518f	1.22231	5.77201	3.77845	0.000233929	0.00169351
hsa-miR-335	0.907942	10.6703	3.7176	0.0002915	0.00202474
hsa-miR-527	1.43006	6.7041	3.71091	0.000298588	0.00204632
rno-miR-327	0.779762	8.21091	3.70235	0.000307898	0.00207419
hsa-miR-199a	0.478201	13.833	3.69887	0.000311755	0.00207419
hsa-miR-521	1.00865	5.02263	3.69619	0.000314761	0.00207419
mir124A-3	0.812151	5.46661	3.65814	0.00036052	0.00234566
rno-miR-93	0.720686	11.6939	3.63914	0.000385648	0.00247779
mir194-3	0.776744	5.44207	3.61074	0.000426318	0.00270528
PREDICTED_MIR213	1.22476	7.02864	3.57464	0.000483876	0.00303308
PREDICTED_MIR187	1.0142	6.29923	3.55024	0.000526847	0.00326264
PREDICTED_MIR182	0.878834	6.48613	3.53532	0.000554877	0.00333277
hsa-miR-29c	-0.563667	12.367	-3.53417	0.000557091	0.00333277
hsa-miR-32	1.03022	7.0453	3.53451	0.000557623	0.00333277
hsa-miR-106b	0.643915	12.2708	3.51901	0.000587105	0.00342723
hsa-miR-367	1.04005	5.70552	3.51417	0.000597011	0.00342723
hsa-miR-30c	-0.549394	12.5303	-3.51267	0.000600098	0.00342723
hsa-miR-93	0.609512	11.6737	3.50757	0.00061075	0.003442
hsa-miR-137	1.03889	5.65363	3.50505	0.000616078	0.003442
mir129-3	0.830185	5.83829	3.48586	0.000658129	0.00361501
mir128B-3	0.912434	5.60331	3.48454	0.000661111	0.00361501
hsa-miR-338	-0.665004	10.7455	-3.47199	0.000690175	0.00373421
PREDICTED_MIR258	1.20227	5.84381	3.45772	0.000724668	0.00387999
rno-miR-96	0.748982	7.89099	3.44922	0.000745993	0.00395299
PREDICTED_MIR222	0.810778	6.8459	3.43752	0.000776296	0.00404561
PREDICTED_MIR166	0.689383	10.2751	3.43405	0.000785486	0.00404561
hsa-miR-519a	1.02624	4.44435	3.43315	0.000787887	0.00404561
mir9-5	0.772131	5.9463	3.43052	0.000794955	0.00404561
hsa-miR-526c	1.06652	5.20332	3.4221	0.000818	0.00412208
has-PreMIR-129-2	0.850465	8.17159	3.41849	0.000828053	0.00413223
hsa-miR-202	0.89329	7.90979	3.39919	0.000883833	0.00436818
PREDICTED_MIR250	0.998896	5.42934	3.39025	0.000910861	0.00445888
has-PreMIR-129-1	1.01541	6.85674	3.3732	0.000964544	0.00467713
hsa-miR-526b	0.946275	5.95432	3.35325	0.0010311	0.00489393
hsa-miR-132	0.696841	8.69062	3.35131	0.00103782	0.00489393
hsa-miR-15a	0.514846	12.8483	3.34164	0.00107181	0.00500829
hsa-miR-452	0.580485	9.47207	3.33301	0.00110305	0.00510782
hsa-miR-432	0.86659	8.50524	3.32543	0.00113115	0.00519119
hsa-miR-20b	0.623611	11.9179	3.3194	0.00115402	0.00524925
hsa-miR-21	0.467899	14.5628	3.28285	0.00130197	0.00581923
hsa-miR-516-5p	1.05301	5.27748	3.27609	0.00133123	0.00589874
PREDICTED_MIR172	0.721434	8.67149	3.27342	0.00134291	0.00589963
hsa-miR-181c	0.735362	8.62485	3.25856	0.00140992	0.00612049
PREDICTED_MIR145	1.10157	7.81956	3.25703	0.001417	0.00612049
hsa-miR-517a	1.00645	5.03911	3.24691	0.00146459	0.00627332
hsa-miR-125b	-0.484327	14.3609	-3.23012	0.00154689	0.00657109
hsa-miR-146a	0.612481	11.142	3.21822	0.00160775	0.00677362
hsa-miR-520b	0.965019	8.61608	3.21077	0.001647	0.00683341
hsa-miR-518d	0.95007	5.79142	3.21049	0.00164853	0.00683341
hsa-miR-197	0.612749	8.57655	3.19994	0.0017057	0.00701382
hsa-miR-519e	0.771762	5.67377	3.1869	0.00177888	0.00725672
hsa-miR-508	0.947792	5.04039	3.18367	0.00179747	0.00727478
hsa-miR-489	0.765098	6.96849	3.13952	0.00207014	0.00831292
hsa-miR-518a-2	1.16882	6.88751	3.13163	0.00212275	0.00845809
hsa-miR-526a	1.02737	5.66083	3.12525	0.00216618	0.00856474
hsa-miR-219	0.632863	7.25039	3.11709	0.00222295	0.00872211
hsa-miR-514	0.918714	5.2743	3.10275	0.00232601	0.00905734
hsa-miR-501	1.05964	5.91726	3.08198	0.00248319	0.00959669
rno-miR-450	0.939074	4.94729	3.07336	0.00255126	0.00978616
hsa-miR-518a	0.952531	5.75154	3.06185	0.00264484	0.0100072
hsa-miR-485-3p	1.00853	5.44197	3.06149	0.00264781	0.0100072
hsa-miR-346	0.736031	6.6551	3.04634	0.00277596	0.0104149
hsa-miR-148a	-0.418074	12.8932	-3.04217	0.00281217	0.0104743
hsa-miR-520e	0.973399	8.43416	3.03831	0.00284613	0.0105245
hsa-miR-511	0.847014	5.65096	3.01461	0.00306306	0.0112458
hsa-miR-302b	0.669282	5.58485	3.00912	0.00311546	0.0113571
hsa-miR-523	0.934018	8.28916	3.00556	0.0031498	0.0114014
PREDICTED_MIR88	0.835886	9.28844	2.99942	0.00321002	0.0115381
hsa-miR-296	0.587072	9.99879	2.99456	0.00325834	0.0116305
PREDICTED_MIR202	0.932127	5.56974	2.98897	0.00331481	0.0117504
PREDICTED_MIR78	0.984075	6.3395	2.97341	0.00347681	0.0122403
hsa-miR-485-5p	0.95775	6.22688	2.96874	0.00352678	0.0123317
PREDICTED_MIR219	1.01995	6.19903	2.9486	0.00375013	0.0129367
mmu-miR-466	0.832801	5.26459	2.93724	0.00388176	0.0132446
hsa-miR-126	-0.416638	12.4995	-2.93646	0.00389091	0.0132446
hsa-miR-512-3p	0.853122	5.70991	2.9316	0.00394861	0.0133525
PREDICTED_MIR160	0.637877	8.25495	2.91523	0.00414882	0.0139226
hsa-miR-507	0.912267	5.99319	2.8967	0.00438668	0.0145468
hsa-miR-20a	0.539311	12.7378	2.87268	0.00471373	0.0155311
rno-miR-330	0.686928	6.25461	2.86467	0.00482765	0.0158052
rno-miR-345	0.735254	5.64577	2.85977	0.00489854	0.0159358
PREDICTED_MIR127	0.801624	7.18514	2.84786	0.00507489	0.0164056
PREDICTED_MIR105	0.852385	5.34661	2.82435	0.00544	0.0174658
PREDICTED_MIR240	0.801176	8.15169	2.82209	0.00547635	0.0174658
PREDICTED_MIR165	0.546156	11.0894	2.82033	0.00550478	0.0174658
PREDICTED_MIR181	0.81981	4.82377	2.80913	0.00568917	0.0177351
hsa-miR-216	0.884909	6.73785	2.80889	0.00569317	0.0177351
hsa-miR-448	0.740978	5.22193	2.80142	0.00581916	0.0180184
hsa-miR-195	-0.478934	13.1912	-2.79364	0.00595329	0.0183233
hsa-miR-154	0.654115	7.12207	2.78633	0.00608177	0.0186073
PREDICTED_MIR194	0.991776	6.70717	2.77129	0.00635399	0.0193252
hsa-miR-525	0.820943	4.90549	2.75119	0.00673524	0.0203642
PREDICTED_MIR200	0.773344	4.87204	2.74522	0.00685251	0.0205976
hsa-miR-15b	0.55483	12.5149	2.74147	0.00692699	0.0207004
hsa-miR-433	0.783288	5.12325	2.73659	0.0070252	0.0208725
hsa-miR-513	0.784992	6.7491	2.73153	0.00712806	0.0209486
mir9-3	0.604595	5.01228	2.73133	0.00713229	0.0209486
anti-mir129-3	0.579724	8.42161	2.72527	0.00725761	0.0211955
hsa-miR-517c	0.814873	4.98412	2.72193	0.00732751	0.0212788
PREDICTED_MIR199	0.798404	5.27358	2.71593	0.00745457	0.0215261
hsa-miR-379	0.679004	7.34273	2.70682	0.00765149	0.021835
hsa-miR-187	0.698846	7.5459	2.70508	0.00768945	0.021835
hsa-miR-345	0.561602	8.68648	2.70275	0.0077409	0.021835
hsa-miR-518b	0.760522	5.94721	2.70263	0.00774355	0.021835
hsa-miR-505	0.58273	7.58153	2.70124	0.00777422	0.021835
hsa-miR-412	0.732374	4.61126	2.69935	0.00781642	0.021835
hsa-miR-377	0.68567	7.58701	2.69143	0.0079947	0.0222123
hsa-miR-372	0.741583	4.7145	2.68766	0.00808085	0.022331
hsa-miR-299-3p	0.749286	5.6357	2.68354	0.00817598	0.0224599
PREDICTED_MIR207	0.66675	9.60315	2.68187	0.0082149	0.0224599
PREDICTED_MIR186	0.922875	5.6801	2.66334	0.0086573	0.0235442
PREDICTED_MIR179	0.676171	4.42937	2.6559	0.00884102	0.0239173
hsa-miR-518c	0.814985	6.45295	2.6514	0.0089536	0.024095
PREDICTED_MIR132	0.802658	5.22978	2.64489	0.00911916	0.0244127
hsa-miR-519d	0.800808	4.80546	2.61099	0.0100259	0.0267012
hsa-miR-127	0.542503	9.2852	2.60617	0.0101613	0.0268404
hsa-miR-517	0.763313	5.12604	2.60542	0.0101826	0.0268404
hsa-miR-512-5p	0.762854	4.88318	2.58517	0.0107704	0.0282447
hsa-miR-423	0.371016	10.6091	2.56628	0.011346	0.0296033
PREDICTED_MIR218	0.680295	4.68414	2.55411	0.0117314	0.03039
hsa-miR-30d	-0.338245	13.5305	-2.55304	0.0117658	0.03039
PREDICTED_MIR214	0.871163	5.61462	2.53897	0.0122271	0.0314236
hsa-miR-383	0.705841	5.23081	2.50732	0.0133242	0.0340729
hsa-miR-515-5p	0.736868	4.44401	2.48647	0.0140947	0.0358647
PREDICTED_MIR206	0.585609	9.61286	2.48324	0.0142175	0.035901
hsa-miR-491	0.593155	9.91911	2.48242	0.0142486	0.035901
hsa-miR-520a	0.73876	5.19719	2.46859	0.0147863	0.0370739
PREDICTED_MIR168	0.669362	4.64691	2.46476	0.0149384	0.0372734
rno-miR-31	-0.752476	11.4004	-2.44059	0.0159308	0.0395577
hsa-miR-492	0.873895	6.75689	2.43782	0.0160481	0.0396573
has-PreMIR-194-1	0.627859	7.62517	2.4326	0.016281	0.0400404
PREDICTED_MIR234	0.714607	6.26427	2.42144	0.016758	0.0410173
hsa-miR-337	0.683078	4.53681	2.40141	0.0176638	0.0429531
hsa-miR-520g	0.685896	4.91484	2.39933	0.0177602	0.0429531
PREDICTED_MIR154	0.547945	8.63517	2.39849	0.0177996	0.0429531
hsa-miR-330	0.340957	8.33367	2.39414	0.0180033	0.0432415
hsa-miR-224	0.63665	10.9326	2.39009	0.018195	0.0434987
hsa-miR-143	-0.280897	14.7425	-2.37968	0.0186954	0.044437
PREDICTED_MIR224	0.617262	4.61411	2.37835	0.0187604	0.044437
hsa-miR-212	0.463801	7.83557	2.37624	0.0188637	0.0444767
hsa-miR-500	0.489368	7.53991	2.36277	0.0195346	0.0458484
PREDICTED_MIR158	0.787148	5.39599	2.35737	0.0198099	0.046271
PREDICTED_MIR243	0.735611	5.14939	2.35527	0.0199177	0.046271
hsa-miR-516-3p	0.770429	7.39695	2.35397	0.0199847	0.046271
hsa-miR-30b	-0.437696	12.6292	-2.35208	0.0200824	0.0462885
mmu-miR-468	0.684937	4.88021	2.34503	0.0204508	0.0469273
hsa-miR-517b	0.715692	5.58213	2.33975	0.0207307	0.0473581
mmu-miR-298	0.736648	7.88531	2.33485	0.0209935	0.0477463
rno-miR-10b	-0.503538	11.0896	-2.3326	0.0211152	0.0478115
PREDICTED_MIR151	0.756714	5.62552	2.32844	0.0213418	0.0479927
hsa-miR-369-3p	0.657446	5.64591	2.3277	0.021382	0.0479927
hsa-miR-518e	0.624376	4.5861	2.32135	0.0217324	0.0485673
hsa-miR-371	0.649308	5.22561	2.31952	0.0218346	0.0485844
mmu-let-7d	0.640742	5.01527	2.31733	0.0219568	0.0486457
hsa-miR-10b	-0.523158	12.0467	-2.31452	0.0221149	0.0487228
PREDICTED_MIR173	0.629419	4.90863	2.31335	0.0221812	0.0487228
PREDICTED_MIR177	0.714359	5.3295	2.30813	0.0224783	0.0491654
hsa-miR-522	0.63024	4.49586	2.30243	0.0228069	0.0496727
PREDICTED_MIR108	0.593937	4.6079	2.28896	0.0236002	0.0510006
hsa-miR-331	0.437686	10.3133	2.28871	0.023615	0.0510006
PREDICTED_MIR153	0.726334	5.18609	2.28031	0.0241218	0.051877
PREDICTED_MIR189	0.514519	11.6577	2.27627	0.024369	0.0521903
has-PreMIR-194-2	0.514323	6.7952	2.27013	0.0247492	0.0527846
hsa-miR-515-3p	0.69345	5.43257	2.2519	0.0259077	0.0550272
PREDICTED_MIR131	0.608552	6.86861	2.24985	0.0260411	0.0550829
PREDICTED_MIR112	0.638873	9.10308	2.24255	0.0265206	0.0558671
PREDICTED_MIR225	0.6721	4.81915	2.2394	0.02673	0.0560785
PREDICTED_MIR150	0.821085	6.18583	2.23216	0.0272159	0.0568657
hsa-miR-519c	0.603233	4.80302	2.2239	0.0277805	0.0578103
hsa-miR-496	0.731744	5.88133	2.22028	0.0280308	0.0580961
PREDICTED_MIR198	0.679026	4.94567	2.21667	0.0282823	0.0582469
mmu-miR-351	0.727707	8.76871	2.21476	0.0284165	0.0582469
PREDICTED_MIR208	0.539081	4.25274	2.21437	0.0284435	0.0582469
mmu-miR-322	0.68852	5.58957	2.20637	0.0290116	0.0591745
PREDICTED_MIR237	0.58896	4.77776	2.19551	0.0297981	0.0605384
PREDICTED_MIR223	0.726341	7.70307	2.18098	0.030879	0.0624875
hsa-miR-519b	0.569026	4.33042	2.17903	0.0310265	0.0625396
hsa-miR-380-3p	0.622172	4.83703	2.16157	0.0323763	0.0650056
PREDICTED_MIR230	0.588413	5.03484	2.15713	0.0327276	0.0653999
hsa-miR-194	0.412566	8.79872	2.15444	0.0329544	0.0653999
rno-miR-451	-0.272003	11.786	-2.15261	0.0330882	0.0654128
rno-miR-211	0.555605	4.6325	2.14638	0.0335913	0.0661531
hsa-miR-188	0.443109	9.81553	2.14	0.0341132	0.0669244
PREDICTED_MIR170	0.57578	4.51801	2.13298	0.0346962	0.0678093
hsa-miR-378	-0.455307	6.86904	-2.12617	0.035269	0.0686677
hsa-miR-130a	0.32619	13.0281	2.12399	0.0354543	0.0687679
hsa-miR-200c	0.357168	13.5258	2.12148	0.0356691	0.0689245
PREDICTED_MIR241	0.634124	4.71613	2.11449	0.0362711	0.0698253
anti-mir194-3	0.432361	9.21541	2.11041	0.0366272	0.0702478
hsa-miR-34a	0.317027	11.0104	2.10144	0.0374205	0.0715023
PREDICTED_MIR192	0.631739	4.65427	2.08409	0.0389961	0.074237
PREDICTED_MIR246	0.638496	6.3287	2.07906	0.039463	0.0748325
hsa-miR-19b	0.381334	13.5358	2.07759	0.0396001	0.0748325
hsa-miR-329	0.674133	6.55988	2.0745	0.0398909	0.0751059
mmu-miR-467	0.63584	5.04587	2.06979	0.0403372	0.0755676
hsa-miR-502	0.657724	5.54252	2.06823	0.0404856	0.0755676
mmu-miR-411	0.63419	5.79256	2.06727	0.0405771	0.0755676
hsa-miR-129	0.66582	5.45341	2.06299	0.0409879	0.075854
hsa-miR-135b	0.548101	8.23379	2.0626	0.0410261	0.075854
PREDICTED_MIR93	0.597292	4.88718	2.04602	0.0426538	0.0785808
hsa-miR-148b	0.415081	10.2083	2.03689	0.043573	0.0799876
PREDICTED_MIR65	0.563347	4.71338	2.02215	0.0450937	0.0823903
mmu-miR-292-3p	0.534556	4.39302	2.01986	0.0453336	0.0823903
hsa-miR-524	0.587378	4.98526	2.01958	0.0453628	0.0823903
mmu-miR-297	0.658078	5.36118	2.00988	0.0463927	0.0839642
PREDICTED_MIR239	0.531059	4.26274	2.00584	0.0468281	0.0843401
hsa-miR-106a	0.303452	13.6216	2.00491	0.0469285	0.0843401
mir124A-5	0.484566	4.98586	1.99045	0.0485163	0.0863744
has-PreMIR-124a	0.514664	5.58798	1.98929	0.048646	0.0863744
mmu-miR-470	0.660026	6.77704	1.98789	0.0488031	0.0863744
hsa-miR-153	0.280225	9.58516	1.98701	0.0489007	0.0863744
PREDICTED_MIR242	0.59906	5.02474	1.98116	0.0495603	0.0872398
PREDICTED_MIR30	0.437366	10.0785	1.97741	0.0499873	0.087691
