# Supplementary material for: Reduced miR-203 predicts metastasis and poor survival in esophageal carcinoma
Source: Aging (Albany NY). 2019 Dec 16;11(24):12114–30. doi: 10.18632/aging.102543 (PMC6949080; doi:10.18632/aging.102543)
Supplement: Supplementary Table 2 [file aging-11-102543-s001..xlsx]

## Sheet: Sheet1
Supplementary Table S2. Differential expression of miRNAs between malignant esophageal tissue and normal in GSE43732
ID	logFC	AveExpr	t	P.Value	adj.P.Val	B
hsa-miR-133b	-3.03607	-3.54737	-15.295	5.34236e-37	1.14861e-35	73.1555
hsa-miR-1	-3.22572	-2.44723	-15.1068	1.28323e-36	2.64859e-35	72.2602
hsa-miR-17-5p	1.01963	-0.960551	13.736	4.47002e-32	5.76632e-31	61.8234
hsa-miR-98	0.706979	-2.67454	10.9636	6.06363e-23	4.52733e-22	40.8832
hsa-miR-133a	-1.65395	-5.82616	-11.2132	6.14172e-23	4.52733e-22	41.0259
hsa-miR-30a-5p	-1.21319	-2.06955	-10.8718	1.19124e-22	8.42024e-22	40.2117
hsa-miR-30a-3p	-1.36889	-5.57336	-10.6709	1.07051e-21	6.57601e-21	38.0948
hsa-miR-203	-1.89258	1.35511	-10.4937	1.94633e-21	1.18154e-20	37.438
hsa-miR-152	0.883801	-4.01113	9.97461	7.88315e-20	4.06771e-19	33.7586
hsa-miR-324-5p	0.673659	-3.27902	9.6579	7.41333e-19	3.57503e-18	31.5342
hsa-miR-409-3p	1.17492	-6.426	9.41623	7.29466e-18	3.24487e-17	29.3382
hsa-miR-17-3p	0.661012	-4.65788	9.19948	1.79874e-17	7.73458e-17	28.3715
hsa-miR-181d	0.70451	-6.22775	7.25692	5.50132e-12	1.78533e-11	15.8888
hsa-miR-429	0.712882	-1.95933	6.89344	4.80434e-11	1.46689e-10	13.7564
hsa-miR-376b	0.793166	-7.1687	5.73418	3.3068e-08	7.82711e-08	7.42176
hsa-miR-30e-3p	-0.319659	-4.64106	-4.3617	1.91615e-05	3.43311e-05	1.20043
hsa-miR-134	0.348413	-4.57362	2.58848	0.0102279	0.013429	-4.66695
hsa-miR-21-5p	2.08145	4.23998	28.2188	3.17304e-78	1.63729e-75	167.903
hsa-miR-424-5p	2.49514	-2.39106	25.7316	5.53552e-71	1.42816e-68	151.258
hsa-miR-139-5p	-2.53067	-6.02318	-27.9957	6.42691e-70	1.10543e-67	148.944
hsa-miR-130b-3p	2.10601	-4.02075	21.6083	3.02918e-58	3.90764e-56	121.97
hsa-miR-93-5p	1.52488	-1.59862	21.5385	5.06188e-58	5.22386e-56	121.457
hsa-miR-21-3p	1.80145	-2.95564	20.7721	1.4764e-55	1.2697e-53	115.789
hsa-miR-7-5p	2.4575	-4.04866	19.4521	2.98547e-51	2.1993e-49	105.888
hsa-miR-455-3p	1.76544	-3.80249	19.4346	3.40977e-51	2.1993e-49	105.755
hsa-miR-3651	1.21951	-3.51143	18.6414	1.42417e-48	8.16523e-47	99.7294
hsa-miR-106b-5p	1.27293	-0.653187	18.5929	2.06421e-48	1.06513e-46	99.3588
hsa-miR-18a-5p	1.68242	-4.06234	18.4541	5.96849e-48	2.79976e-46	98.2986
hsa-miR-25-3p	1.35163	-1.36576	18.4066	8.58691e-48	3.69237e-46	97.9354
hsa-miR-18b-5p	1.65053	-5.35416	18.3196	1.67204e-47	6.63672e-46	97.27
hsa-miR-183-5p	1.84413	-5.03474	18.0189	1.93696e-46	7.13909e-45	94.8276
hsa-miR-301a-3p	1.63656	-3.85729	17.9548	2.7516e-46	9.46551e-45	94.4736
hsa-miR-151a-3p	1.12635	-4.04196	17.4112	1.81507e-44	5.8536e-43	90.2913
hsa-miR-455-5p	1.53516	-5.28223	17.3607	2.68124e-44	8.13836e-43	89.9019
hsa-miR-185-5p	1.02924	-3.81506	16.994	4.57285e-43	1.31088e-41	87.0703
hur_2	0.645687	6.72976	16.4904	2.26879e-41	6.16157e-40	83.1732
mr_1	0.917027	1.4335	16.0215	8.67133e-40	2.2372e-38	79.537
hsa-miR-4465	1.52311	-4.07107	15.7263	8.61225e-39	2.11615e-37	77.2461
hsa-miR-99a-5p	-1.64906	-0.874727	-15.4995	5.03066e-38	1.17992e-36	75.485
hsa-miR-15b-5p	0.906527	0.40802	15.3166	2.08773e-37	4.68378e-36	74.0651
hsa-miR-182-5p	2.01999	-6.76428	15.0041	4.94672e-36	9.81735e-35	70.9346
hur_4	0.8133	3.26312	14.8084	1.08834e-35	2.07994e-34	70.1208
hsa-miR-16-2-3p	1.07464	-6.43258	14.7374	1.89007e-35	3.48312e-34	69.5702
hsa-miR-629-3p	1.84244	-7.69415	14.8177	6.36085e-35	1.11646e-33	68.4308
hsa-miR-96-5p	1.47857	-2.16364	14.5787	6.49104e-35	1.11646e-33	68.3396
hsa-miR-4306	0.989153	-3.08858	14.5502	8.0971e-35	1.34777e-33	68.1191
hsa-miR-205-3p	1.25671	-4.56062	14.589	9.1407e-35	1.47394e-33	68.015
hsa-miR-1290	2.60372	-3.16801	14.3238	4.69969e-34	7.3486e-33	66.3652
hur_1	0.554669	6.71283	14.1946	1.28052e-33	1.94338e-32	65.3657
hsa-miR-1246	2.62655	-0.348444	14.1702	1.54785e-33	2.28197e-32	65.1766
hsa-miR-128	1.0242	-4.11206	14.1282	2.14348e-33	3.07231e-32	64.852
hsa-miR-15b-3p	1.25609	-8.34634	14.1485	6.09167e-33	8.49541e-32	63.8621
hsa-miR-103a-3p	0.746509	-0.0671126	13.8827	1.43569e-32	1.94952e-31	62.9557
hsa-miR-145-5p	-2.19279	1.0368	-13.841	1.98325e-32	2.62399e-31	62.6336
hsa-miR-19a-3p	0.979571	-0.690007	13.6003	1.2752e-31	1.60364e-30	60.7784
hsa-miR-497-5p	-1.29067	-1.96113	-13.5973	1.30529e-31	1.60364e-30	60.7551
hsa-miR-29c-3p	-1.06426	1.0617	-13.5791	1.50181e-31	1.80217e-30	60.6153
hsa-miR-181b-5p	1.1458	-4.53852	13.486	3.08222e-31	3.61461e-30	59.8986
hsa-miR-195-5p	-1.21557	-0.680235	-13.2864	1.43604e-30	1.64666e-29	58.3649
hsa-miR-145-3p	-1.70258	-3.83297	-13.0537	8.5986e-30	9.64539e-29	56.5814
miRNABrightCorner30	1.07567	1.70569	12.9356	2.12907e-29	2.33745e-28	55.6779
hsa-miR-454-3p	0.821089	-5.19264	12.8363	4.55715e-29	4.89893e-28	54.9197
hsa-miR-944	1.90985	-6.71629	12.7671	3.00975e-28	3.13014e-27	53.1128
hur_6	0.847918	5.05921	12.5884	3.03308e-28	3.13014e-27	53.0315
hsa-miR-378a-3p	-0.91626	-1.67122	-12.5278	4.81231e-28	4.86892e-27	52.5717
hsa-miR-214-5p	1.56687	-6.60365	12.6463	7.80408e-28	7.74405e-27	52.167
hsa-miR-338-3p	-1.18743	-3.47639	-12.3813	1.4693e-27	1.43049e-26	51.46
hsa-miR-34b-5p	1.06305	-3.49727	12.2033	5.67807e-27	5.42571e-26	50.1138
hsa-miR-143-3p	-1.8473	-0.710738	-12.1994	5.84889e-27	5.44922e-26	50.0843
hsa-miR-155-5p	1.30821	-3.49682	12.1979	5.91388e-27	5.44922e-26	50.0733
hsa-miR-100-5p	-1.19326	-1.10151	-11.9139	5.06451e-26	4.58472e-25	47.9351
hsa-miR-146b-5p	1.14039	-2.75778	11.7841	1.34564e-25	1.19716e-24	46.9624
hsa-miR-4668-5p	1.89783	-5.91367	12.1151	1.93588e-25	1.69307e-24	46.7939
hsa-miR-107	0.621716	-0.0555715	11.7273	2.06302e-25	1.7742e-24	46.5371
hsa-miR-16-5p	0.581785	1.67996	11.713	2.29626e-25	1.94241e-24	46.4305
hsa-miR-140-3p	-0.828281	-3.0929	-11.6326	4.1967e-25	3.49273e-24	45.8304
hsa-miR-141-5p	1.2232	-6.85561	11.6598	4.28686e-25	3.51115e-24	45.8247
hsa-miR-378i	-0.866624	-2.75543	-11.4991	1.13993e-24	9.19066e-24	44.836
hsa-miR-181a-5p	0.861549	-2.38649	11.3755	2.86631e-24	2.27541e-23	43.9186
hsa-miR-3198	1.48337	-3.27646	11.0898	2.38897e-23	1.86774e-22	41.8094
hsa-miR-3648	1.28848	-5.74645	11.0479	3.38021e-23	2.60326e-22	41.4673
hsa-let-7i-5p	0.689729	1.04135	11.0069	4.40713e-23	3.34423e-22	41.2005
hsa-miR-630	2.06078	-4.27101	10.9387	7.28522e-23	5.29461e-22	40.7007
hsa-miR-493-5p	1.48054	-6.93965	10.9996	1.12037e-22	8.02933e-22	40.3423
hsa-miR-92a-3p	0.71238	-1.32405	10.7662	2.5843e-22	1.80202e-21	39.4418
hsa-miR-22-5p	0.874328	-5.08196	10.7593	2.71752e-22	1.86965e-21	39.3918
hsa-miR-4746-3p	1.05857	-5.87463	10.7411	3.10669e-22	2.10928e-21	39.2588
hsa-let-7d-5p	0.63246	-0.329537	10.7131	3.81215e-22	2.55463e-21	39.0554
hsa-miR-29c-5p	-1.07964	-4.82911	-10.6939	4.38554e-22	2.88304e-21	38.9161
hsa-miR-425-5p	0.609867	-3.25774	10.693	4.41396e-22	2.88304e-21	38.9097
hsa-miR-143-5p	-1.5879	-4.91858	-10.6487	7.24036e-22	4.67004e-21	38.4329
hsa-miR-378a-5p	-0.986764	-6.37627	-10.7577	8.35555e-22	5.3228e-21	38.3761
hur_5	0.645031	-2.42197	10.5761	1.03568e-21	6.51724e-21	38.062
hsa-miR-27a-3p	0.627277	1.81828	10.572	1.0665e-21	6.57601e-21	38.0329
hsa-miR-125b-5p	-0.995975	0.96887	-10.4736	2.18075e-21	1.30845e-20	37.3221
hsa-miR-23a-3p	0.58562	2.22693	10.4374	2.83572e-21	1.68187e-20	37.0611
hsa-miR-140-5p	-0.685403	-2.90651	-10.3886	4.03679e-21	2.36703e-20	36.7102
hsa-miR-148b-3p	0.615047	-3.4465	10.3706	4.59664e-21	2.66502e-20	36.5812
hsa-miR-4417	1.76006	-5.41037	10.3285	7.27869e-21	4.17312e-20	36.1395
hsa-miR-224-5p	1.29055	-2.00321	10.293	8.05219e-21	4.56586e-20	36.0243
hsa-miR-20a-5p	0.697366	0.288112	10.2523	1.07963e-20	6.05533e-20	35.7329
hsa-miR-181a-2-3p	1.53523	-8.45661	10.7749	1.12125e-20	6.22112e-20	36.0059
hsa-miR-378d	-0.787736	-5.71053	-10.2043	1.52423e-20	8.36703e-20	35.3904
hsa-miR-1181	1.36757	-5.83438	10.1393	2.73224e-20	1.48404e-19	34.8225
hsa-miR-26b-5p	-0.596316	0.428012	-10.1158	2.87632e-20	1.54602e-19	34.7597
hsa-miR-1224-5p	-1.29327	-3.78207	-10.0292	5.34028e-20	2.84081e-19	34.1453
hsa-miR-5703	1.99059	-4.70077	10.0639	6.31111e-20	3.32299e-19	34.023
hsa-miR-4291	0.621874	-3.8445	9.99707	6.71756e-20	3.50128e-19	33.9175
hsa-miR-545-3p	1.00028	-8.10942	10.0894	8.65366e-20	4.42108e-19	33.757
hsa-miR-4324	-1.13072	-5.39436	-9.88714	1.46822e-19	7.42748e-19	33.1412
hsa-miR-339-3p	1.04492	-8.80332	10.1916	1.65015e-19	8.26678e-19	33.246
hsa-miR-126-3p	-0.619365	0.480272	-9.6918	5.84068e-19	2.89787e-18	31.7708
hsa-miR-9-5p	2.33541	-6.76383	10.1267	6.457e-19	3.17315e-18	31.9691
hsa-miR-22-3p	0.645966	0.448138	9.66686	6.96112e-19	3.38862e-18	31.5967
hsa-miR-423-5p	0.491723	-4.62581	9.60697	1.06007e-18	5.06479e-18	31.1794
hsa-miR-135a-3p	1.47478	-6.51903	9.60282	1.11829e-18	5.29391e-18	31.1292
hsa-miR-642b-3p	1.46903	-3.73598	9.56965	1.37692e-18	6.45901e-18	30.9199
hsa-miR-590-5p	0.606036	-3.68661	9.55026	1.57702e-18	7.33101e-18	30.7853
hsa-miR-19b-3p	0.586387	0.853933	9.54688	1.61475e-18	7.43938e-18	30.7619
hsa-miR-331-3p	0.528129	-2.05277	9.47806	2.61121e-18	1.19237e-17	30.2851
hsa-miR-95	-0.816952	-4.78075	-9.43997	3.40475e-18	1.5411e-17	30.0219
hsa-miR-20b-5p	0.690851	-1.43155	9.40906	4.22156e-18	1.89419e-17	29.8087
hsa-miR-23b-3p	-0.693403	1.35763	-9.28272	1.01323e-17	4.46861e-17	28.9405
hsa-miR-642a-3p	1.51874	-1.4181	9.26176	1.17101e-17	5.1207e-17	28.797
hsa-miR-3663-3p	0.877486	-3.62507	9.2403	1.35787e-17	5.88791e-17	28.6503
hsa-miR-4428	1.04916	-5.51456	9.18319	2.01196e-17	8.57994e-17	28.2605
hsa-miR-132-3p	0.768764	-5.02334	9.13044	2.89023e-17	1.22242e-16	27.9015
hsa-miR-9-3p	2.22067	-6.78054	9.41874	8.04985e-17	3.37701e-16	27.2262
hsa-miR-4257	1.02576	-5.56628	8.96791	8.76838e-17	3.64878e-16	26.8018
hsa-miR-382-5p	1.12602	-7.36777	8.95665	3.43646e-16	1.41857e-15	25.6266
hsa-miR-10b-5p	-0.586435	-1.93105	-8.59091	1.1086e-15	4.53998e-15	24.2895
hsa-miR-151b	0.588823	-2.76792	8.51995	1.77629e-15	7.21704e-15	23.823
hsa-miR-150-5p	-1.26365	-1.91744	-8.48809	2.19362e-15	8.84304e-15	23.6142
hsa-let-7i-3p	0.783069	-8.95663	8.62801	3.18995e-15	1.27598e-14	23.4418
hsa-miR-214-3p	0.888009	-2.80659	8.39414	4.07747e-15	1.61844e-14	23.0009
dmr_31a	0.338207	-0.556652	8.22776	1.2115e-14	4.77201e-14	21.9241
hsa-miR-652-3p	0.561944	-6.20383	8.20689	1.38771e-14	5.42467e-14	21.7898
hsa-miR-484	0.510307	-5.44229	8.10932	2.61153e-14	1.0132e-13	21.1649
hsa-miR-2392	1.35919	-5.68137	8.11445	2.63599e-14	1.01505e-13	21.1638
hsa-miR-4651	1.35077	-6.11953	8.11698	3.25421e-14	1.24383e-13	21.0008
hsa-miR-494	0.791942	-0.50826	8.03694	4.16373e-14	1.57977e-13	20.704
hsa-miR-135b-5p	1.1571	-2.57751	8.01238	4.87515e-14	1.83619e-13	20.5482
hsa-miR-223-3p	0.98169	0.0730972	7.89521	1.03092e-13	3.85473e-13	19.8085
hsa-miR-1268a	0.977289	-3.25438	7.87988	1.13654e-13	4.2191e-13	19.7122
hsa-miR-3676-5p	1.10588	-0.49026	7.85482	1.33271e-13	4.91198e-13	19.555
hsa-miR-502-5p	0.539093	-7.94531	7.89399	1.59536e-13	5.83835e-13	19.4644
hsa-miR-4530	0.734854	-0.446982	7.8198	1.66397e-13	6.04655e-13	19.3358
hsv1-miR-H18	0.760563	-4.12546	7.74312	2.70008e-13	9.74295e-13	18.858
hsa-miR-24-3p	0.382031	1.65399	7.71818	3.15884e-13	1.13192e-12	18.7032
hsa-miR-4317	0.811887	-6.91499	7.81891	3.75708e-13	1.337e-12	18.6931
hsa-miR-199a-3p	0.705067	0.850223	7.68587	3.86909e-13	1.36743e-12	18.503
hsa-miR-151a-5p	0.526152	-1.94575	7.67522	4.13601e-13	1.45182e-12	18.4372
hsa-miR-4298	1.34649	-4.44151	7.61599	5.989e-13	2.08806e-12	18.072
hsa-miR-19b-1-5p	0.695693	-8.61109	7.62016	7.64814e-13	2.64862e-12	17.8917
hsa-miR-423-3p	0.600488	-8.31347	7.61069	7.79062e-13	2.67997e-12	17.8646
hsa-miR-3141	1.27871	-4.80884	7.54315	9.5248e-13	3.25483e-12	17.617
hsa-miR-3162-5p	0.820309	-1.79031	7.42576	1.94453e-12	6.60118e-12	16.9108
hsa-miR-199a-5p	0.78051	-1.0486	7.4028	2.23879e-12	7.55043e-12	16.7719
hsa-miR-15a-5p	0.381528	-0.371585	7.33263	3.43884e-12	1.15223e-11	16.349
hsa-miR-4459	1.01046	0.223514	7.32507	3.60092e-12	1.19876e-11	16.3037
hsa-miR-7-1-3p	0.555008	-6.28064	7.30597	4.04523e-12	1.33804e-11	16.189
hsa-miR-197-3p	0.541621	-5.57588	7.30107	4.1674e-12	1.36967e-11	16.1597
hsa-miR-27b-3p	-0.48766	1.50245	-7.2583	5.40328e-12	1.76462e-11	15.9039
hsa-miR-4793-5p	1.19288	-5.55199	7.26234	6.27472e-12	2.0236e-11	15.805
hsa-miR-374a-5p	0.482198	-1.75731	7.18602	8.36242e-12	2.68013e-11	15.4739
hsa-miR-200a-5p	0.741015	-6.2908	7.18834	8.4818e-12	2.70161e-11	15.4677
hsa-miR-769-5p	0.629045	-6.7118	7.11375	1.33845e-11	4.23706e-11	15.0212
hsa-miR-324-3p	0.482241	-3.45864	7.10404	1.36799e-11	4.30416e-11	14.9894
ebv-miR-BART13	0.488842	-4.88292	7.04106	1.99185e-11	6.22906e-11	14.6197
hsa-miR-4484	1.24208	-5.58453	7.02438	2.21841e-11	6.89577e-11	14.5163
hsa-miR-4449	0.570542	-6.5063	6.93538	3.72406e-11	1.15067e-10	14.0043
hsa-miR-874	0.447921	-5.28767	6.89226	4.7991e-11	1.46689e-10	13.7549
hsa-miR-4745-5p	0.577037	-5.82798	6.85448	5.9882e-11	1.81759e-10	13.5373
hsa-miR-483-5p	1.39784	-4.77194	6.82423	7.43273e-11	2.24286e-10	13.338
hsa-miR-505-3p	0.526158	-5.51175	6.77873	9.31246e-11	2.79374e-10	13.1034
hsa-miR-505-5p	0.959958	-8.13911	6.70759	2.38216e-10	7.10516e-10	12.3518
hsa-miR-4499	0.970745	-4.86455	6.55156	3.43465e-10	1.01855e-09	11.8221
hsa-miR-154-3p	0.879539	-6.70799	6.60796	3.51535e-10	1.03653e-09	11.9171
hsa-miR-4672	0.502566	-2.8579	6.54495	3.566e-10	1.04549e-09	11.7853
hsa-miR-1587	0.856968	-3.96633	6.52063	4.09335e-10	1.19332e-09	11.65
hsa-miR-4313	0.465071	-6.53484	6.50269	4.56043e-10	1.32201e-09	11.5465
hsa-miR-101-3p	-0.460779	-1.62956	-6.48221	5.08633e-10	1.46623e-09	11.437
hsa-miR-379-5p	0.876741	-7.02957	6.49767	5.71597e-10	1.63858e-09	11.3977
hsa-miR-3679-5p	0.973617	-3.26386	6.44156	6.39448e-10	1.82296e-09	11.2126
hsa-miR-1185-1-3p	0.895814	-5.67205	6.42293	7.14386e-10	2.0254e-09	11.1064
hsa-miR-644b-3p	0.408583	-4.38808	6.36677	9.71805e-10	2.74017e-09	10.8023
hsa-miR-766-3p	0.561345	-6.62012	6.35398	1.04361e-09	2.92665e-09	10.7325
hsa-miR-4800-5p	1.16021	-4.63263	6.33193	1.17972e-09	3.29047e-09	10.6124
hsa-miR-4443	0.913529	-2.16761	6.31094	1.32547e-09	3.67712e-09	10.4983
hsa-miR-4507	0.674785	-2.4791	6.30853	1.34328e-09	3.7066e-09	10.4852
hsa-miR-452-5p	0.520228	-5.13161	6.30779	1.38979e-09	3.81452e-09	10.4644
hsa-miR-1280	1.03692	-2.81398	6.29267	1.46659e-09	4.00401e-09	10.3992
hsa-miR-1273g-3p	0.416649	1.5398	6.25744	1.78148e-09	4.83813e-09	10.2087
hsa-miR-193b-3p	0.560784	-2.16401	6.23603	2.00429e-09	5.41472e-09	10.0933
hsa-let-7a-3p	0.53708	-8.52607	6.26153	2.22793e-09	5.98756e-09	10.0919
hsa-miR-32-5p	0.612574	-5.73784	6.18036	2.71933e-09	7.27032e-09	9.79471
hsa-miR-663a	1.11155	-4.02654	6.17481	2.80317e-09	7.45585e-09	9.76499
hsa-miR-451a	-0.810725	2.15972	-6.14826	3.23972e-09	8.57279e-09	9.62338
hsa-miR-574-5p	0.936447	-2.1668	6.12127	3.75191e-09	9.87748e-09	9.47979
hsa-miR-4788	0.80647	-4.6697	6.09309	4.37113e-09	1.14492e-08	9.33039
hsa-miR-671-5p	1.06176	-5.18502	6.09068	4.45149e-09	1.16008e-08	9.31504
hsa-miR-34a-3p	0.411974	-6.94598	6.06336	5.213e-09	1.35171e-08	9.16563
hsa-miR-4649-3p	0.366066	-6.83212	6.03563	6.14636e-09	1.58576e-08	9.01205
hsa-miR-1275	0.931631	-3.83119	6.02437	6.33092e-09	1.62525e-08	8.96823
hsa-miR-3162-3p	0.396092	-6.90768	5.9881	7.92351e-09	2.02403e-08	8.76382
hsa-miR-4690-5p	1.0244	-5.94373	5.96471	8.75437e-09	2.21499e-08	8.65397
hsa-miR-374b-5p	0.419959	-3.00642	5.96375	8.75693e-09	2.21499e-08	8.65124
hsa-miR-575	0.696314	-3.26924	5.94627	9.61137e-09	2.41925e-08	8.56029
hsa-miR-4442	0.887966	-4.36295	5.94076	9.89776e-09	2.47924e-08	8.53161
hsv2-miR-H6	0.571363	-3.89323	5.92984	1.0489e-08	2.61466e-08	8.47494
hsa-miR-181c-5p	0.487763	-5.64914	5.90447	1.2056e-08	2.99081e-08	8.34142
hsa-miR-4669	1.02673	-4.37802	5.86934	1.44476e-08	3.54999e-08	8.1623
hsa-miR-125a-5p	0.498304	-3.23195	5.83569	1.72466e-08	4.21765e-08	7.98946
hsa-miR-150-3p	0.7494	-4.45768	5.82254	1.84786e-08	4.49762e-08	7.92213
hsa-miR-629-5p	0.52472	-8.56152	5.86273	1.87692e-08	4.5469e-08	8.02035
hsa-miR-4505	0.5785	-1.60026	5.79221	2.16586e-08	5.21728e-08	7.76721
hsa-miR-369-5p	0.594644	-7.7898	5.86167	2.17387e-08	5.21728e-08	7.94569
hsa-miR-5100	0.291254	3.58031	5.76886	2.44651e-08	5.84444e-08	7.64837
hsa-miR-4486	0.970374	-6.42004	5.76935	2.77616e-08	6.60137e-08	7.59951
hsa-miR-342-3p	0.417184	-1.9831	5.67666	3.94432e-08	9.29346e-08	7.18275
hsa-miR-188-5p	0.860962	-5.08744	5.65142	4.49106e-08	1.05336e-07	7.05627
hsa-miR-26a-5p	-0.424255	0.638489	-5.64776	4.57634e-08	1.0685e-07	7.03794
hsa-miR-200c-3p	0.618582	0.0101238	5.63401	4.91057e-08	1.14138e-07	6.96927
hsa-miR-141-3p	0.628237	0.989448	5.61656	5.36936e-08	1.24242e-07	6.88228
hsa-miR-582-5p	-0.402602	-5.03535	-5.61507	5.41043e-08	1.24633e-07	6.87486
hsa-miR-4270	0.785248	-3.21566	5.60001	5.84276e-08	1.33994e-07	6.8
hsa-miR-125b-2-3p	-0.638887	-6.4808	-5.61463	6.21754e-08	1.41958e-07	6.82924
hsa-miR-4665-3p	0.356611	-5.63149	5.58635	6.26432e-08	1.42396e-07	6.73216
hsa-let-7c	-0.322154	0.953982	-5.54795	7.61353e-08	1.72306e-07	6.54229
hsa-miR-146a-5p	0.606613	-2.86858	5.53205	8.25153e-08	1.8593e-07	6.46397
hsa-miR-4767	0.70485	-7.70446	5.60253	9.15551e-08	2.05402e-07	6.61909
hsa-miR-4485	1.1744	-3.97322	5.44511	1.27764e-07	2.85395e-07	6.03873
hsa-miR-30b-3p	0.445003	-7.84029	5.41754	1.59177e-07	3.54031e-07	5.88095
hsa-miR-23b-5p	-0.586653	-7.55421	-5.38947	1.76496e-07	3.90868e-07	5.75819
hsa-miR-1281	0.435418	-6.95463	5.3218	2.37013e-07	5.22644e-07	5.44314
hsa-miR-4327	0.714482	-5.13346	5.30286	2.58438e-07	5.67465e-07	5.35436
hsa-miR-3652	0.925116	-5.35936	5.25828	3.22374e-07	7.04852e-07	5.14222
hsa-miR-374c-5p	0.499799	-7.06734	5.269	3.23827e-07	7.05041e-07	5.18011
hsa-miR-24-1-5p	-0.452315	-5.56091	-5.24913	3.36026e-07	7.28527e-07	5.0996
hsa-miR-4778-5p	0.986304	-5.16265	5.25876	3.41498e-07	7.37292e-07	5.13461
hsa-miR-3125	0.615781	-5.09526	5.21621	3.94275e-07	8.47691e-07	4.94455
hsa-miR-30d-3p	0.645423	-8.86323	5.29434	4.16483e-07	8.91722e-07	5.17857
hsa-miR-410	0.835786	-6.7704	5.23173	5.32741e-07	1.13593e-06	4.91119
hsa-miR-320c	0.301713	-1.98206	5.11861	6.30654e-07	1.33917e-06	4.48933
hsa-miR-4284	0.340132	0.748749	5.11144	6.52613e-07	1.38012e-06	4.45618
hsa-miR-361-5p	0.323177	-3.02325	5.06409	8.17513e-07	1.72178e-06	4.23807
hsa-miR-4455	0.978057	-5.087	5.04023	9.40752e-07	1.97223e-06	4.12714
hsa-miR-4787-3p	0.400983	-6.41624	5.03422	9.44071e-07	1.97223e-06	4.10114
hsa-miR-144-3p	-0.756078	-2.26228	-5.02177	9.98532e-07	2.06925e-06	4.04452
hsa-miR-411-5p	0.666242	-7.21145	5.04503	1.04621e-06	2.15938e-06	4.12914
hsa-miR-130a-3p	0.36401	-0.387753	4.99347	1.14062e-06	2.34487e-06	3.91585
hsa-miR-132-5p	0.422241	-7.72776	4.98871	1.30205e-06	2.6661e-06	3.88622
hsa-miR-20a-3p	0.437515	-6.43309	4.96031	1.33888e-06	2.73068e-06	3.76565
hsa-miR-3195	0.499425	-2.93083	4.94962	1.40026e-06	2.84461e-06	3.7176
hsa-miR-1914-3p	0.603419	-5.61314	4.93663	1.49123e-06	3.01755e-06	3.65912
hsa-miR-340-5p	0.380295	-4.27703	4.92998	1.53429e-06	3.09255e-06	3.62927
hsa-miR-4430	0.425406	-5.10028	4.88686	1.87351e-06	3.76161e-06	3.43634
hsa-miR-4488	0.347402	-7.47633	4.81075	2.72588e-06	5.43071e-06	3.10074
hsa-miR-1273f	0.953993	-5.52997	4.77642	3.12667e-06	6.20524e-06	2.94931
hsa-miR-1225-3p	0.335862	-6.9957	4.76807	3.32275e-06	6.56912e-06	2.91479
hsa-miR-625-5p	0.512825	-6.73251	4.75391	3.45436e-06	6.80324e-06	2.85085
hsa-miR-744-5p	0.355378	-6.30576	4.73186	3.82376e-06	7.50214e-06	2.75528
hsa-miR-224-3p	0.424759	-5.4662	4.67131	5.03593e-06	9.84296e-06	2.49491
hsa-miR-4271	0.784781	-5.51217	4.65709	5.43355e-06	1.05801e-05	2.43686
hsa-miR-4286	0.382872	2.18453	4.64923	5.49996e-06	1.06691e-05	2.39832
hsa-miR-1288	0.395204	-5.88587	4.63809	5.79038e-06	1.11904e-05	2.35114
hsa-miR-23a-5p	0.83363	-7.59604	4.63284	6.06198e-06	1.16716e-05	2.33384
hsa-miR-362-5p	0.309951	-5.59941	4.60492	6.69291e-06	1.28384e-05	2.20952
hsa-miR-30c-2-3p	0.582176	-7.72053	4.63994	6.97839e-06	1.33365e-05	2.39935
hsa-miR-4281	0.423177	-0.271418	4.5801	7.46629e-06	1.42163e-05	2.10442
hsa-miR-4750	0.616926	-7.3053	4.63493	7.62146e-06	1.44067e-05	2.34577
hsa-miR-4763-3p	0.431761	-1.83715	4.57539	7.62217e-06	1.44067e-05	2.08456
hsa-miR-200a-3p	0.45796	-0.905381	4.54922	8.56452e-06	1.61288e-05	1.9749
hsa-miR-602	0.762227	-7.40543	4.58364	8.94054e-06	1.67757e-05	2.14935
hsv2-miR-H22	0.64967	-5.73569	4.53038	9.34982e-06	1.74801e-05	1.89777
hsa-miR-1972	0.813746	-6.12862	4.53014	9.44842e-06	1.76007e-05	1.90016
hsv2-miR-H25	0.488556	-3.61359	4.50796	1.0233e-05	1.89937e-05	1.80168
hsa-miR-125a-3p	0.858667	-4.93396	4.50505	1.03628e-05	1.91657e-05	1.78959
hsa-miR-4739	-0.85357	-0.44206	-4.48775	1.11698e-05	2.05843e-05	1.71763
hsa-miR-365a-3p	0.341544	-1.18215	4.44577	1.33871e-05	2.45827e-05	1.54396
hsa-miR-4515	0.605327	-6.29575	4.43655	1.40466e-05	2.57024e-05	1.50969
hsa-miR-299-5p	0.534333	-6.45957	4.41032	1.58213e-05	2.88474e-05	1.40536
hsa-miR-513a-5p	0.768644	-6.59803	4.46045	1.59982e-05	2.90671e-05	1.65825
hsa-miR-718	0.694109	-6.68053	4.37925	1.79617e-05	3.25201e-05	1.27658
hsa-miR-557	0.748388	-6.66071	4.42144	1.82091e-05	3.28528e-05	1.49623
hsa-miR-501-3p	0.882387	-7.7079	4.39234	1.84589e-05	3.31874e-05	1.36097
hsa-miR-4716-3p	0.408708	-4.78078	4.35157	2.00012e-05	3.57115e-05	1.15938
hsa-miR-337-3p	0.608537	-7.52043	4.38596	2.04998e-05	3.64754e-05	1.37072
hsa-miR-500a-5p	0.57318	-6.99417	4.31231	2.36333e-05	4.19064e-05	1.00205
hsa-miR-765	0.923122	-5.68217	4.32286	2.37702e-05	4.20049e-05	1.07552
hsa-miR-1273e	0.886093	-6.63258	4.29729	2.6285e-05	4.62904e-05	0.971829
hsa-miR-30c-5p	-0.509357	-1.92461	-4.28483	2.64754e-05	4.64671e-05	0.891189
hsa-miR-4436b-5p	0.750413	-6.76234	4.30435	2.70351e-05	4.72885e-05	1.03131
hsa-miR-4433-3p	0.522783	-5.4657	4.27727	2.73649e-05	4.77037e-05	0.861904
hsa-miR-4497	0.310539	-3.42811	4.27278	2.78409e-05	4.83701e-05	0.843131
hsa-miR-296-5p	0.378783	-6.1789	4.19536	3.83568e-05	6.64165e-05	0.537209
hsa-miR-4749-3p	0.371821	-7.01746	4.18062	4.18244e-05	7.21786e-05	0.497366
hsa-miR-5581-5p	0.389302	-4.70097	4.1498	4.62184e-05	7.94956e-05	0.359435
hsv1-miR-H6-3p	0.397906	-7.54223	4.17042	4.69724e-05	8.05241e-05	0.497549
hsa-miR-335-5p	0.459094	-5.41345	4.1326	4.95684e-05	8.4693e-05	0.29276
hsa-miR-5585-3p	0.732696	-4.02257	4.1005	5.64497e-05	9.61322e-05	0.168961
hsa-miR-654-3p	0.521825	-6.42836	4.086	6.06243e-05	0.000102902	0.12484
hsa-miR-5001-5p	0.562884	-2.38499	4.07365	6.28964e-05	0.000106408	0.0660488
hsa-miR-4725-5p	0.332755	-7.33084	4.07194	6.5816e-05	0.000110984	0.0910298
hsa-miR-4323	0.345979	-8.14733	4.07788	6.85623e-05	0.000115238	0.151571
dmr_6	0.514533	0.804116	4.01936	7.81357e-05	0.000130903	-0.14023
hsa-miR-495	-0.509543	-5.9702	-4.01698	7.95418e-05	0.000132827	-0.14065
hsa-miR-4653-3p	0.37454	-5.31772	4.01167	8.05582e-05	0.00013409	-0.169239
hsa-miR-29a-3p	-0.278313	1.3383	-4.01043	8.09581e-05	0.000134323	-0.173943
hsa-miR-584-5p	0.716751	-6.97494	4.01189	8.6523e-05	0.000143096	-0.104741
hsa-miR-3917	0.789015	-6.10682	4.0055	8.95272e-05	0.000147591	-0.110822
hsa-miR-4787-5p	0.680319	-1.82873	3.98052	9.11272e-05	0.00014975	-0.286306
hsa-miR-340-3p	0.389598	-7.3349	3.9857	9.16266e-05	0.000150093	-0.240862
dmr_3	0.500212	1.09564	3.9779	9.20757e-05	0.000150351	-0.296135
hsa-miR-4701-5p	0.431593	-7.8134	3.96917	0.000101638	0.000165442	-0.270756
hsa-miR-4646-5p	0.796116	-5.3473	3.95024	0.000105821	0.00017171	-0.362631
hsa-miR-3156-5p	0.523066	-5.44781	3.9398	0.000107059	0.000173174	-0.436909
hsa-miR-144-5p	-0.56341	-6.60117	-3.91994	0.000119189	0.000192193	-0.47337
hsa-miR-4713-3p	0.352226	-3.3638	3.86099	0.000145227	0.000233449	-0.728046
hsa-miR-1304-3p	0.284186	-7.15253	3.84219	0.000159511	0.000255333	-0.769359
hsa-miR-127-3p	0.450557	-5.06726	3.83606	0.000159831	0.000255333	-0.818693
hsa-miR-126-5p	-0.659404	-4.46496	-3.82235	0.000168944	0.000269059	-0.864263
hsa-miR-3679-3p	0.325986	-8.05709	3.83489	0.000170208	0.000270238	-0.756669
hsa-miR-4741	0.634659	-3.78341	3.78754	0.000192327	0.000304419	-0.993617
hsa-miR-3127-5p	0.580134	-6.11669	3.79156	0.000195366	0.000308284	-0.937866
hsa-miR-1228-3p	0.294947	-5.57029	3.68961	0.000277857	0.000435789	-1.34062
ebv-miR-BART12	0.647444	-6.57206	3.69063	0.000289028	0.000451263	-1.2687
hsa-miR-212-3p	0.538	-7.44426	3.70031	0.000289473	0.000451263	-1.18063
hsa-miR-4433-5p	0.318816	-5.25796	3.63474	0.000340343	0.000528966	-1.53151
hsa-miR-129-1-3p	0.337536	-8.1209	3.64427	0.000349092	0.000540917	-1.40691
hsa-miR-1234	0.270208	-6.01439	3.62702	0.000350128	0.000540917	-1.55816
hsa-miR-4667-5p	0.845876	-5.41911	3.57509	0.000433471	0.000667675	-1.68329
hsa-miR-501-5p	0.600699	-7.8759	3.58233	0.000435727	0.000669152	-1.6173
hsa-miR-99b-5p	0.307379	-3.62947	3.54072	0.000479122	0.000733612	-1.8526
hsa-miR-148a-3p	-0.274455	-0.468953	-3.51523	0.000525045	0.000801548	-1.93837
hsa-miR-1249	0.325401	-4.6763	3.491	0.000572472	0.000871373	-2.01933
hsa-miR-3656	0.292463	-2.59708	3.48947	0.0005756	0.000873557	-2.02443
hsa-miR-30b-5p	-0.296717	-0.311734	-3.48607	0.000582622	0.000881621	-2.03578
hsa-miR-4701-3p	0.604547	-5.80701	3.47848	0.000609645	0.000919816	-2.01752
hsa-miR-939	0.532036	-4.00659	3.41197	0.000756626	0.00113494	-2.27998
hsa-miR-205-5p	0.443588	2.63548	3.39439	0.000804528	0.00120329	-2.33726
hsa-miR-378f	0.448046	-7.36883	3.38991	0.000834257	0.00124057	-2.29736
hsa-miR-1305	0.353829	-4.14478	3.366	0.000887843	0.00131646	-2.42911
hsa-miR-3907	0.334388	-6.28996	3.3391	0.000974187	0.00144034	-2.51553
hsa-miR-31-3p	0.729506	-3.36244	3.33819	0.000981426	0.0014469	-2.50624
hsa-miR-5006-5p	0.624824	-4.51957	3.32227	0.00103211	0.00151729	-2.56927
hsa-miR-3665	0.284266	-0.934836	3.3102	0.00107561	0.00157675	-2.60766
hsa-miR-4419a	0.700791	-6.09161	3.27316	0.00126214	0.00183973	-2.61917
hsa-miR-10a-5p	-0.330377	-2.03087	-3.25813	0.00128356	0.00186568	-2.7718
hsv1-miR-H1	0.647591	-6.88848	3.25518	0.0013827	0.00200413	-2.61553
hsa-miR-4478	0.615767	-5.93002	3.18442	0.0016775	0.00242462	-2.92092
hsa-miR-197-5p	0.459117	-0.943938	3.13869	0.0019093	0.00275196	-3.13928
hsa-miR-4731-3p	0.336648	-7.19316	3.03256	0.0027508	0.0039538	-3.3709
hsa-miR-3188	-0.406835	-4.88907	-3.01779	0.00282045	0.00404265	-3.49839
hsa-miR-193a-5p	0.293392	-6.24895	3.00655	0.00292283	0.00417297	-3.53111
hsa-miR-136-3p	-0.352698	-6.17055	-2.94373	0.00357488	0.00506769	-3.69221
hsa-miR-551b-3p	-0.490948	-5.70884	-2.92159	0.00384865	0.00544083	-3.72723
hsa-miR-1226-5p	0.49111	-6.74014	2.90619	0.0041256	0.00581642	-3.68274
hsa-miR-425-3p	0.291896	-7.84457	2.90675	0.00419049	0.00589181	-3.62514
hsa-miR-4728-5p	0.533469	-4.15869	2.87411	0.00441476	0.00619026	-3.9081
hsa-miR-29b-1-5p	0.341603	-7.30598	2.84496	0.00483155	0.00675631	-3.98137
hsv2-miR-H24	0.277115	-3.60447	2.83662	0.00494853	0.00688446	-4.01196
hsa-miR-28-3p	0.329732	-8.39414	2.82266	0.0051888	0.00719737	-4.02096
hsa-miR-1539	0.41813	-7.47302	2.8415	0.0052079	0.0072045	-3.73491
hsa-miR-1973	0.696047	-3.44377	2.79719	0.0055725	0.00766776	-4.11978
hsa-miR-4697-5p	0.602786	-6.69448	2.79604	0.00576116	0.00790627	-3.92981
hsa-miR-4299	0.444505	-1.54769	2.76639	0.00610879	0.0083611	-4.20303
hsa-miR-4698	0.497252	-6.46758	2.76851	0.00624088	0.0085193	-4.02842
hsa-miR-4656	0.540414	-6.45619	2.75761	0.00638124	0.00868791	-4.10707
hsa-miR-3194-5p	0.509278	-6.05628	2.75494	0.00645314	0.00876268	-4.10542
hsa-miR-4738-3p	0.534662	-6.07317	2.72019	0.00714237	0.00967313	-4.19336
hsa-miR-3135b	0.611236	-2.66531	2.70249	0.00737336	0.00995983	-4.37301
hsa-miR-1185-2-3p	0.468167	-6.48039	2.70274	0.00756997	0.0101987	-4.20578
hiv1-miR-H1	0.555917	-6.28369	2.69173	0.0077097	0.0103539	-4.3116
hsa-miR-5194	0.382227	-5.89832	2.68843	0.00772531	0.0103539	-4.37143
hsa-miR-486-5p	-0.33937	-5.93404	-2.61013	0.00965248	0.0128368	-4.58443
hsa-miR-31-5p	0.579527	-2.17868	2.5967	0.0100029	0.0132008	-4.63815
hsa-miR-33b-3p	0.54143	-7.66086	2.5977	0.0103584	0.0135658	-4.39747
hsa-miR-4688	0.569319	-6.57836	2.56349	0.0112172	0.0146533	-4.55488
hsa-miR-378b	0.436013	-5.69138	2.54998	0.011431	0.0148949	-4.73614
hsa-miR-4734	0.26325	-6.32885	2.54434	0.0115757	0.0150077	-4.77753
hsa-miR-218-5p	-0.326483	-4.38198	-2.47211	0.0141347	0.0182337	-4.94855
hsa-miR-3180-5p	0.285847	-8.09195	2.46069	0.0151465	0.0194902	-4.70638
hsa-miR-550a-5p	0.52851	-7.68699	2.4326	0.0160916	0.0206549	-4.84843
hsa-miR-200b-3p	0.281926	0.0999249	2.41435	0.0165119	0.0211417	-5.09271
hsa-miR-1915-3p	0.294651	-1.04366	2.39446	0.0174122	0.0222394	-5.13954
hsa-miR-892b	0.279604	-6.57053	2.37546	0.0183581	0.0233895	-5.15725
hsa-miR-345-3p	0.543445	-6.1875	2.37672	0.0187534	0.0238343	-4.93607
hsa-miR-1285-3p	0.353232	-7.33174	2.3571	0.0194241	0.0246261	-5.10556
hsv1-miR-H1_v14.0	0.555556	-6.21902	2.2697	0.0244103	0.0307963	-5.26061
hsa-miR-638	-0.328868	-0.666275	-2.20054	0.0287211	0.0361466	-5.57679
hsa-miR-4758-5p	0.492291	-6.67044	2.17493	0.0312211	0.0391453	-5.38171
hsa-let-7b-3p	0.281515	-7.94351	2.1705	0.0312556	0.0391453	-5.50936
hsa-miR-4462	0.444004	-6.74693	2.13979	0.0338222	0.0422573	-5.49164
hsa-miR-211-3p	0.468123	-5.7719	2.1334	0.0344947	0.0429934	-5.49336
