# Supplementary material for: Reduced miR-203 predicts metastasis and poor survival in esophageal carcinoma
Source: Aging (Albany NY). 2019 Dec 16;11(24):12114–30. doi: 10.18632/aging.102543 (PMC6949080; doi:10.18632/aging.102543)
Supplement: Supplementary Table 3 [file aging-11-102543-s005..xlsx]

## Sheet: Sheet1
Supplementary Table S3. Top pathways associated with 162 candidate targets of miR-203 in EC according to the enrichment analysis based on GO biological process
Term	Count	%	Genes	pValue
GO:0006355: regulation of transcription, DNA-templated	28	17.7215	MEF2A, ZBTB34, TMEM189-UBE2V1, SRSF10, ZBTB10, ARID4B, ZNF800, UBE2V1, RORA, ATF2, ZNF207, PDPK1, TSC22D2, MIER3, ZNF74, RARB, AXIN2, INO80D, CCAR1, RBBP4, CBL, SFMBT1, ATRX, BNC2, SP3, COMMD2, LCOR, DNM2	0.000247
GO:0045944: positive regulation of transcription from RNA polymerase II promoter	21	13.2911	MYOD1, MEF2A, KMT2A, NUCKS1, OTX1, ARID4B, BMPR2, RORA, FOXP1, ATF2, ATRX, RPS6KA3, RAD21, SP3, VEGFA, PPP1R12A, RARB, FGF1, TCF4, PIK3R1, NFIB	0.000355
GO:0045893: positive regulation of transcription, DNA-templated	14	8.86076	KLF6, E2F3, PICALM, TMEM189-UBE2V1, KMT2A, SP3, UBE2V1, PTCH1, RORA, TCF4, TRERF1, DNM2, SERTAD2, ZNF423	0.000602
GO:0010595: positive regulation of endothelial cell migration	5	3.16456	NRP1, VEGFA, BMPR2, FGF1, FOXP1	0.000691
GO:0030335: positive regulation of cell migration	8	5.06329	SEMA6D, VEGFA, KIF5C, CBLL1, FGF1, PIK3R1, PLAU, CCAR1	0.00118823
GO:0006351: transcription, DNA-templated	31	19.6203	E2F3, MEF2A, ZBTB34, ZBTB10, ARID4B, ZNF800, RORA, PDPK1, MIER1, MIER3, ZNF74, RARB, INO80D, ZNF423, CCAR1, SERTAD2, KLF6, RBBP4, ZHX1, TRERF1, SFMBT1, PURB, FOXP1, ATRX, TRIM33, BNC2, SP3, ZNF710, COMMD2, LCOR, NFIB	0.00148082
GO:0048842: positive regulation of axon extension involved in axon guidance	3	1.89873	NRP1, VEGFA, BMPR2	0.00155306
GO:0071679: commissural neuron axon guidance	3	1.89873	NRP1, VEGFA, NFIB	0.00155306
GO:0000381: regulation of alternative mRNA splicing, via spliceosome	4	2.53165	RBFOX2, MYOD1, CELF4, MBNL2	0.00443103
GO:0001701: in utero embryonic development	7	4.43038	FUT8, TANC2, VEGFA, RPGRIP1L, PTCH1, BCL2L1, FOXP1	0.00609919
GO:0031290: retinal ganglion cell axon guidance	3	1.89873	NRCAM, NRP1, EPHB1	0.0118057
GO:0008589: regulation of smoothened signaling pathway	3	1.89873	RPGRIP1L, PTCH1, RORA	0.0118057
GO:0017148: negative regulation of translation	4	2.53165	CELF4, IREB2, SYNCRIP, FXR1	0.0142776
GO:0048025: negative regulation of mRNA splicing, via spliceosome	3	1.89873	SRSF10, SRSF7, CELF4	0.0143338
GO:0008380: RNA splicing	6	3.79747	RBFOX2, PRPF4B, SRSF7, QKI, SYNCRIP, MBNL2	0.0154357
GO:0006357: regulation of transcription from RNA polymerase II promoter	10	6.32911	MYOD1, RAD21, LCORL, NUCKS1, VEGFA, ARID4B, ZNF710, TRERF1, FOXP1, ATF2	0.0156618
GO:0038190: VEGF-activated neuropilin signaling pathway	2	1.26582	NRP1, VEGFA	0.0174322
GO:0090259: regulation of retinal ganglion cell axon guidance	2	1.26582	NRP1, VEGFA	0.0174322
GO:1902336: positive regulation of retinal ganglion cell axon guidance	2	1.26582	NRP1, VEGFA	0.0174322
